# Supplementary material for: Congenital hypopituitarism in two brothers with a duplication of the ‘acrogigantism gene’ GPR101: clinical findings and review of the literature
Source: PubMed Central journal article supplement (PMC7966638; doi:10.1007/s11102-020-01101-8), 2020-11-13
Supplement: 11102_2020_1101_MOESM2_ESM.pdf [file 11102_2020_1101_MOESM2_ESM.pdf]

**Supplemental table 1: 70 genes included in the duplicated region found in the two brothers**

| chrom | ChromStart | Chrom End | Gene Symbol  | Gene Description                                                              | Disease association                                                                                                                                                                                                        |
|-------|------------|-----------|--------------|-------------------------------------------------------------------------------|----------------------------------------------------------------------------------------------------------------------------------------------------------------------------------------------------------------------------|
| chrX  | 133507341  | 133562822 | PHF6         | Homo sapiens PHD finger protein 6                                             | Borjeson-Forssman-Lehmann syndrome (BFLS), characterized by cognitive disability, epilepsy, hypogonadism, hypometabolism, obesity, swelling of subcutaneous tissue of the face, narrow palpebral fissures, and large ears. |
| chrX  | 133594174  | 133634698 | HPRT1        | hypoxanthine phosphoribosyltransferase 1                                      | Mutations in this gene result in Lesch-Nyhan syndrome (a condition characterized by neurological and behavioral abnormalities and the overproduction of uric acid in the body) or gout.                                    |
| chrX  | 133674214  | 133674292 | MIR450B      | microRNA 450b                                                                 |                                                                                                                                                                                                                            |
| chrX  | 133674370  | 133674461 | MIR450A1     | microRNA 450a-1                                                               |                                                                                                                                                                                                                            |
| chrX  | 133674537  | 133674637 | MIR450A2     | microRNA 450a-2                                                               |                                                                                                                                                                                                                            |
| chrX  | 133675370  | 133675467 | MIR542       | microRNA 542                                                                  |                                                                                                                                                                                                                            |
| chrX  | 133678456  | 133680653 | MIR503HG     | MIR503 host gene                                                              | Pre-Eclampsia                                                                                                                                                                                                              |
| chrX  | 133680357  | 133680428 | MIR503       | microRNA 503                                                                  | tumor suppressor                                                                                                                                                                                                           |
| chrX  | 133680643  | 133680741 | MIR424       | Homo sapiens microRNA 424 (MIR424), microRNA.                                 |                                                                                                                                                                                                                            |
| chrX  | 133684053  | 133694428 | LINC00629    | long intergenic non-protein coding RNA 629                                    | Gastric cancer                                                                                                                                                                                                             |
| chrX  | 133699872  | 133792513 | PLAC1        | placenta-specific 1                                                           | Pre-Eclampsia                                                                                                                                                                                                              |
| chrX  | 133830061  | 133830113 | Mir_1302     | Rfam model RF00951                                                            | Recurrent Implantation Failure, male infertility                                                                                                                                                                           |
| chrX  | 133903595  | 133930385 | FAM122B      | family with sequence similarity 122B                                          |                                                                                                                                                                                                                            |
| chrX  | 133941222  | 133988641 | FAM122C      | family with sequence similarity 122C                                          |                                                                                                                                                                                                                            |
| chrX  | 134021661  | 134049297 | MOSPD1       | Homo sapiens motile sperm domain containing 1 (MOSPD1), mRNA.                 | Short stature and Right ventricle development                                                                                                                                                                              |
| chrX  | 134124967  | 134126503 | SMIM10       | small integral membrane protein 10                                            |                                                                                                                                                                                                                            |
| chrX  | 134154533  | 134156566 | FAM127C      | family with sequence similarity 127, member C                                 |                                                                                                                                                                                                                            |
| chrX  | 134166332  | 134167575 | FAM127A      | family with sequence similarity 127, member A                                 |                                                                                                                                                                                                                            |
| chrX  | 134184962  | 134186221 | FAM127B      | family with sequence similarity 127, member B                                 |                                                                                                                                                                                                                            |
| chrX  | 134229014  | 134232733 | LINC00087    | long intergenic non-protein coding RNA 87                                     |                                                                                                                                                                                                                            |
| chrX  | 134252881  | 134254405 | LINC00633    | s long intergenic non-protein coding RNA 633                                  |                                                                                                                                                                                                                            |
| chrX  | 134254548  | 134257529 | BC061642     | uncharacterized protein;                                                      |                                                                                                                                                                                                                            |
| chrX  | 134290460  | 134305751 | CXorf48      | chromosome X open reading frame 48                                            | chronic myeloid leukemia                                                                                                                                                                                                   |
| chrX  | 134382887  | 134477957 | DKFZp451F083 | Homo sapiens mRNA; cDNA DKFZp451F083 (from clone DKFZp451F083); complete cds. |                                                                                                                                                                                                                            |
| chrX  | 134419722  | 134429965 | ZNF75D       | Homo sapiens zinc finger protein 75D (ZNF75D), transcript variant 2, mRNA.    |                                                                                                                                                                                                                            |
| chrX  | 134478695  | 134497338 | ZNF449       | zinc finger protein 449                                                       |                                                                                                                                                                                                                            |
| chrX  | 134540020  | 134540794 | AB062081     | cDNA, SINE-R retroposon, isolate:HFB-1.                                       |                                                                                                                                                                                                                            |
| chrX  | 134555867  | 134560225 | LINC00086    | long intergenic non-protein coding RNA 86                                     | Gastric cancer                                                                                                                                                                                                             |
| chrX  | 134562092  | 134562210 | 5S_rRNA      | Rfam model RF00001                                                            |                                                                                                                                                                                                                            |
| chrX  | 134654554  | 134716460 | DDX26B       | DEAD/H box polypeptide 26B                                                    | Autism spectrum disorder                                                                                                                                                                                                   |
| chrX  | 134847184  | 134856988 | CT45A1       | cancer/testis antigen family 45, member A1                                    |                                                                                                                                                                                                                            |
| chrX  | 134883487  | 134891519 | CT45A3       | cancer/testis antigen family 45, member A3                                    |                                                                                                                                                                                                                            |
| chrX  | 134928696  | 134936735 | CT45A4       | Homo sapiens cancer/testis antigen family 45, member A4 (CT45A4), mRNA.       |                                                                                                                                                                                                                            |
| chrX  | 134945650  | 134953994 | CT45A5       | cancer/testis antigen family 45, member A5                                    |                                                                                                                                                                                                                            |
| chrX  | 134963214  | 134971244 | CT45A6       | cancer/testis antigen family 45, member A6                                    |                                                                                                                                                                                                                            |
| chrX  | 134975784  | 134995220 | SAGE1        | sarcoma antigen 1                                                             | tumor specific,excellent sources of antigens for cancer immunotherapy.                                                                                                                                                     |
| chrX  | 135044230  | 135056134 | MMGT1        | membrane magnesium transporter 1                                              |                                                                                                                                                                                                                            |
| chrX  | 135067585  | 135129428 | SLC9A6       | solute carrier family 9, subfamily A                                          | Mental retardation, X-linked syndromic cognitive disability, Christianson type.                                                                                                                                            |

| chrom | ChromStart | Chrom End | Gene Symbol | Gene Description                                                                               | Disease association                                                                                                                                                                         |
|-------|------------|-----------|-------------|------------------------------------------------------------------------------------------------|---------------------------------------------------------------------------------------------------------------------------------------------------------------------------------------------|
| chrX  | 135229558  | 135293518 | FHL1        | four and a half LIM domains 1                                                                  | patients with Emery-Dreifuss muscular dystrophy, reducing body myopathy, Uruguay faciocardiomusculoskeletal syndrome                                                                        |
| chrX  | 135298973  | 135333738 | MAP7D3      | MAP7 domain containing 3                                                                       |                                                                                                                                                                                             |
| chrX  | 135570124  | 135574598 | BRS3        | bombesin-like receptor 3                                                                       |                                                                                                                                                                                             |
| chrX  | 135579670  | 135594503 | HTATSF1     | HIV-1 Tat specific factor 1                                                                    |                                                                                                                                                                                             |
| chrX  | 135614310  | 135638966 | VGLL1       | vestigial like 1                                                                               | Tumor suppressor and cancer                                                                                                                                                                 |
| chrX  | 135633036  | 135633119 | MIR934      | microRNA 934                                                                                   |                                                                                                                                                                                             |
| chrX  | 135721701  | 135724588 | LINC00892   | long intergenic non-protein coding RNA 892                                                     |                                                                                                                                                                                             |
| chrX  | 135730335  | 135742549 | CD40LG      | CD40 ligand                                                                                    | A defect in this gene results in an inability to undergo immunoglobulin class switch and is associated with hyper-IgM syndrome                                                              |
| chrX  | 135747711  | 135863503 | ARHGEF6     | Rac/Cdc42 guanine nucleotide exchange factor (GEF) 6                                           |                                                                                                                                                                                             |
| chrX  | 135856157  | 135856264 | U6          | Rfam model RF00026 hit found at contig region AL683813.10/545-651                              |                                                                                                                                                                                             |
| chrX  | 135955605  | 135962939 | RBMX        | Homo sapiens RNA binding motif protein, X-linked (RBMX), transcript variant 1, mRNA.           | X-linked intellectual disability syndrome                                                                                                                                                   |
| chrX  | 135961357  | 135961430 | SNORD61     | Homo sapiens small nucleolar RNA, C/D box 61 (SNORD61), small nuclear RNA.                     |                                                                                                                                                                                             |
| chrX  | 135991553  | 136075814 | AK055694    | Homo sapiens cDNA FLJ31132 fis, clone IMR322000953.                                            |                                                                                                                                                                                             |
| chrX  | 136112306  | 136113833 | GPR101      | G protein-coupled receptor 101                                                                 | Pituitary adenoma 2, GH-secreting, XLAG                                                                                                                                                     |
| chrX  | 136648345  | 136654259 | ZIC3        | Zic family member 3                                                                            | Heterotaxy and congenital heart disease                                                                                                                                                     |
| chrX  | 136770049  | 136770153 | U6          | Rfam model RF00026 hit found at contig region AL591398.2/79459-79356                           |                                                                                                                                                                                             |
| chrX  | 137696891  | 137699799 | LINC00889   | Homo sapiens long intergenic non-protein coding RNA 889 (LINC00889), non-coding RNA.           |                                                                                                                                                                                             |
| chrX  | 137713733  | 138287185 | FGF13       | fibroblast growth factor 13                                                                    | Borjeson-Forssman-Lehmann syndrome (BFLS).                                                                                                                                                  |
| chrX  | 137749871  | 137749954 | MIR504      | microRNA 504                                                                                   |                                                                                                                                                                                             |
| chrX  | 137794268  | 137798763 | FGF13-AS1   | FGF13 antisense RNA 1                                                                          |                                                                                                                                                                                             |
| chrX  | 137922164  | 137922184 | JB158051    | Sequence 1454 from Patent EP1777301.                                                           |                                                                                                                                                                                             |
| chrX  | 138528977  | 138531132 | SRD5A1P1    | steroid-5-alpha-reductase, alpha polypeptide 1 pseudogene 1                                    |                                                                                                                                                                                             |
| chrX  | 138612894  | 138645617 | F9          | Homo sapiens coagulation factor IX (F9), mRNA.                                                 | factor IX deficiency, which is a recessive X-linked disorder, also called hemophilia B or Christmas disease.                                                                                |
| chrX  | 138663929  | 138790381 | MCF2        | Homo sapiens MCF.2 cell line derived transforming sequence (MCF2), transcript variant 3, mRNA. | biomarker for Borderline personality disorder (BPD)                                                                                                                                         |
| chrX  | 138681375  | 138681459 | Mir_548     | Rfam model RF01061 hit found at contig region AL033403.1/72536-72619                           |                                                                                                                                                                                             |
| chrX  | 138808504  | 138914447 | ATP11C      | Homo sapiens ATPase, class VI, type 11C (ATP11C), transcript variant 1, mRNA.                  | Congenital hemolytic anemia                                                                                                                                                                 |
| chrX  | 139006306  | 139006390 | MIR505      | Homo sapiens microRNA 505 (MIR505), microRNA.                                                  |                                                                                                                                                                                             |
| chrX  | 139037883  | 139047677 | CXorf66     | Homo sapiens chromosome X open reading frame 66 (CXorf66), mRNA.                               |                                                                                                                                                                                             |
| chrX  | 139173825  | 139175070 | LOC389895   | Homo sapiens chromosome 16 open reading frame 72-like (LOC389895), mRNA.                       |                                                                                                                                                                                             |
| chrX  | 139533312  | 139533373 | U7          | Rfam model RF00066 hit found at contig region AL121875.10/53331-53391                          |                                                                                                                                                                                             |
| chrX  | 139585151  | 139587225 | SOX3        | SRY (sex determining region Y)-box 3                                                           | associated with X-linked cognitive disability with growth hormone deficiency (GDH), Mental retardation (MR), X-linked hypopituitarism, 46,XX, Disorder of Sex and neural tube defects (NTD) |
